# Supplementary material for: A decade-plus of Antarctic sea ice thickness and volume estimates from CryoSat-2 using a physical model and waveform fitting
Source: Copernicus journal article supplement (doi:10.5194/tc-17-2487-2023), 2023-06-23
Supplement: Supplementary file 1 [file tc-17-2487-2023-supplement.pdf]

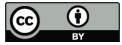

*Supplement of*

## **A decade-plus of Antarctic sea ice thickness and volume estimates from CryoSat-2 using a physical model and waveform fitting**

**Steven Fons et al.**

*Correspondence to:* Nathan Kurtz ([nathan.t.kurtz@nasa.gov](mailto:nathan.t.kurtz@nasa.gov))

The copyright of individual parts of the supplement might differ from the article licence.

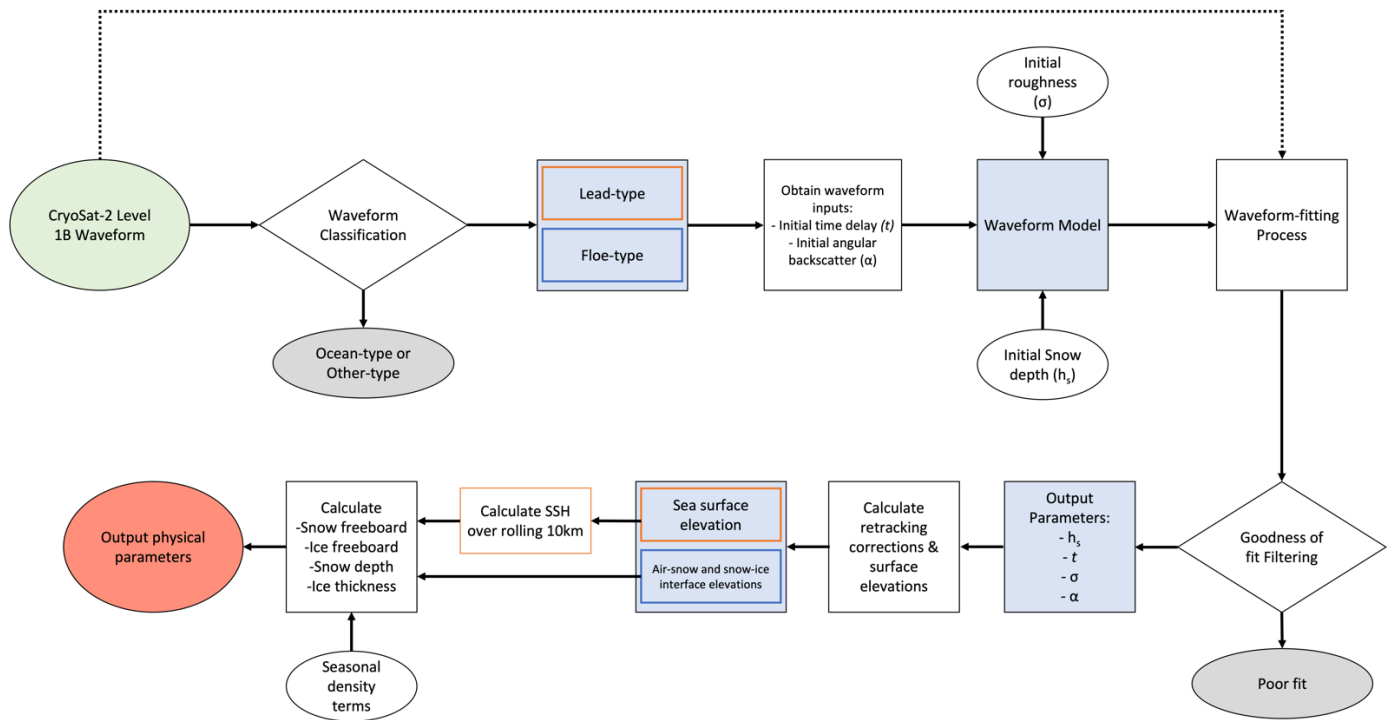

Figure S1: A flowchart of the CS2WFA procedure. Ovals show input/output data (green is start, red is end, white are inputs, grey is discarded), diamonds show decision/filtering processes, white squares show calculations/other processes, and blue squares show ‘milestones’ (inset orange squares for lead-type milestones, blue for floe-type milestones).

Table S1: Years of ICESat and ICESat-2 data included in each month of the initialization “climatology” for the input snow depth parameter.

| Month     | ICESat Years Included | ICESat-2 Years Included |
|-----------|-----------------------|-------------------------|
| January   | -                     | 2019                    |
| February  | 2004-2006, 2008       | 2019                    |
| March     | 2004-2008             | 2019                    |
| April     | 2007                  | 2019                    |
| May       | 2004-2006             | 2019                    |
| June      | 2004-2006             | 2019                    |
| July      | -                     | 2019                    |
| August    | -                     | 2019                    |
| September | -                     | 2019                    |
| October   | 2003-2007             | 2018-2019               |
| November  | 2003-2007             | 2018-2019               |
| December  | -                     | 2018-2019               |
